# Supplementary material for: Multiorgan Failure Post-Abdominal Surgery: A Systematic Review of Trends and Clinical Outcomes
Source: Research Square preprint supplement (doi:10.21203/rs.3.rs-6187343/v1), 2025-03-18
Supplement: Supplementary file 1 [file 2964459f96c6e3250ea8f211.docx]

| Databases | Search strategy | Number of papers |
| --- | --- | --- |
| Pubmed | ((((((((("Multiple organ failure"[Title/Abstract]) OR ("Multiple organ failures"[Title/Abstract])) OR ("Organ failure"[Title/Abstract])) OR ("MOF"[Title/Abstract])) OR ("Organ dysfunction"[Title/Abstract])) OR ("Multiple organ dysfunction syndrome"[Title/Abstract])) OR ("MOD"[Title/Abstract])) OR ("MODS"[Title/Abstract])) AND (((((((((((((((((((((((((((((((((((((((("Abdominal surgery"[Title/Abstract]) OR ("Digestive System Surgical Procedure"[Title/Abstract])) OR ("Digestive surgery"[Title/Abstract])) OR ("General surgery"[Title/Abstract])) OR ("Gynaecologic surgery"[Title/Abstract])) OR ("Laparoscopy"[Title/Abstract])) OR ("Laparotomy"[Title/Abstract])) OR ("bariatric surgery"[Title/Abstract])) OR ("visceral surgery"[Title/Abstract])) OR ("gastrointestinal surgery"[Title/Abstract])) OR ("Oesophagectomy"[Title/Abstract])) OR ("esophagectomy"[Title/Abstract])) OR ("Liver Transplantation"[Title/Abstract])) OR ("Liver resection"[Title/Abstract])) OR ("Hepatectomy"[Title/Abstract])) OR ("Liver surgery"[Title/Abstract])) OR ("Gastrectomy"[Title/Abstract])) OR ("Gastroenterostomy"[Title/Abstract])) OR ("Biliary Tract Surgical Procedures"[Title/Abstract])) OR ("Splenectomy"[Title/Abstract])) OR ("Pancreaticoduodenectomy"[Title/Abstract])) OR ("Pancreas Transplantation"[Title/Abstract])) OR ("Pancreatectomy"[Title/Abstract])) OR ("Pancreaticojejunostomy"[Title/Abstract])) OR ("Pancreatic surgery"[Title/Abstract])) OR ("Pancreatic resection"[Title/Abstract])) OR ("Appendectomy"[Title/Abstract])) OR ("Colorectal surgery"[Title/Abstract])) OR ("Cholecystectomy"[Title/Abstract])) OR ("Colectomy"[Title/Abstract])) OR ("Colorectal surgery"[Title/Abstract])) OR ("Colorectal resection"[Title/Abstract])) OR ("Proctectomy"[Title/Abstract])) OR ("Cystectomy"[Title/Abstract])) OR ("Nephrectomy"[Title/Abstract])) OR ("Kidney Transplantation"[Title/Abstract])) OR ("Hysterectomy"[Title/Abstract])) OR ("Ovariectomy"[Title/Abstract])) OR ("Salpingectomy"[Title/Abstract])) OR ("Prostatectomy"[Title/Abstract]))) AND (((Management[Title/Abstract]) OR ((((((Prevalence[Title/Abstract]) OR (Prevalences[Title/Abstract])) OR ("Point Prevalence"[Title/Abstract])) OR ("Point Prevalences"[Title/Abstract])) OR ("Period Prevalence"[Title/Abstract])) OR ("Period Prevalences"[Title/Abstract]))) OR ((((((((((((((Causality[Title/Abstract]) OR (Causalities[Title/Abstract])) OR ("Enabling Factors"[Title/Abstract])) OR ("Enabling Factor"[Title/Abstract])) OR ("Multifactorial Causality"[Title/Abstract])) OR ("Multifactorial Causalities"[Title/Abstract])) OR ("Multiple Causation"[Title/Abstract])) OR ("Multiple Causations"[Title/Abstract])) OR ("Predisposing Factors"[Title/Abstract])) OR ("Predisposing Factor"[Title/Abstract])) OR ("Reinforcing Factors"[Title/Abstract])) OR ("Reinforcing Factor"[Title/Abstract])) OR (Causation[Title/Abstract])) OR (Causations[Title/Abstract]))) | **642** |
| Scopus | TITLE-ABS ( "Multiple organ failure" ) OR TITLE-ABS ( "Multiple organ failures" ) OR TITLE-ABS ( "Organ failure" ) OR TITLE-ABS ( "MOF" ) OR TITLE-ABS ( "Organ dysfunction" ) OR TITLE-ABS ( "Multiple organ dysfunction syndrome" ) OR TITLE-ABS ( "MOD" ) OR TITLE-ABS ( "MODS" ) AND TITLE-ABS ( "Abdominal surgery" ) OR TITLE-ABS ( "Digestive System Surgical Procedure" ) OR TITLE-ABS ( "Digestive surgery" ) OR TITLE-ABS ( "General surgery" ) OR TITLE-ABS ( "Gynaecologic surgery" ) OR TITLE-ABS ( "Laparoscopy" ) OR TITLE-ABS ( "Laparotomy" ) OR TITLE-ABS ( "bariatric surgery" ) OR TITLE-ABS ( "visceral surgery" ) OR TITLE-ABS ( "gastrointestinal surgery" ) OR TITLE-ABS ( "Oesophagectomy" ) OR TITLE-ABS ( "esophagectomy" ) OR TITLE-ABS ( "Liver Transplantation" ) OR TITLE-ABS ( "Liver resection" ) OR TITLE-ABS ( "Hepatectomy" ) OR TITLE-ABS ( "Liver surgery" ) OR TITLE-ABS ( "Gastrectomy" ) OR TITLE-ABS ( "Gastroenterostomy" ) OR TITLE-ABS ( "Biliary Tract Surgical Procedures" ) OR TITLE-ABS ( "Splenectomy" ) OR TITLE-ABS ( "Pancreaticoduodenectomy" ) OR TITLE-ABS ( "Pancreas Transplantation" ) OR TITLE-ABS ( "Pancreatectomy" ) OR TITLE-ABS ( "Pancreaticojejunostomy" ) OR TITLE-ABS ( "Pancreatic surgery" ) OR TITLE-ABS ( "Pancreatic resection" ) OR TITLE-ABS ( "Appendectomy" ) OR TITLE-ABS ( "Colorectal surgery" ) OR TITLE-ABS ( "Cholecystectomy" ) OR TITLE-ABS ( "Colectomy" ) OR TITLE-ABS ( "Colorectal resection" ) OR TITLE-ABS ( "Proctectomy" ) OR TITLE-ABS ( "Cystectomy" ) OR TITLE-ABS ( "Nephrectomy" ) OR TITLE-ABS ( "Kidney Transplantation" ) OR TITLE-ABS ( "Hysterectomy" ) OR TITLE-ABS ( "Ovariectomy" ) OR TITLE-ABS ( "Salpingectomy" ) OR TITLE-ABS ( "Prostatectomy" ) AND TITLE-ABS ( "Management" ) OR TITLE-ABS ( "Prevalence" ) OR TITLE-ABS ( "Prevalences" ) OR TITLE-ABS ( "Point Prevalence" ) OR TITLE-ABS ( "Point Prevalences" ) OR TITLE-ABS ( "Period Prevalence" ) OR TITLE-ABS ( "Period Prevalences" ) OR TITLE-ABS ( "Causality" ) OR TITLE-ABS ( "Causalities" ) OR TITLE-ABS ( "Enabling Factors" ) OR TITLE-ABS ( "Enabling Factor" ) OR TITLE-ABS ( "Multifactorial Causality" ) OR TITLE-ABS ( "Multifactorial Causalities" ) OR TITLE-ABS ( "Multiple Causation" ) OR TITLE-ABS ( "Multiple Causations" ) OR TITLE-ABS ( "Predisposing Factors" ) OR TITLE-ABS ( "Predisposing Factor" ) OR TITLE-ABS ( "Reinforcing Factors" ) OR TITLE-ABS ( "Reinforcing Factor" ) OR TITLE-ABS ( "Causation" ) OR TITLE-ABS ( "Causations" ) | **752** |
| Web of Science | (((((((TS=("Multiple organ failure")) OR TS=("Multiple organ failures")) OR TS=("Organ failure")) OR TS=("MOF")) OR TS=("Organ dysfunction")) OR TS=("Multiple organ dysfunction syndrome")) OR TS=("MOD")) OR TS=("MODS") AND ((((((((((((((((((((((((((((((((((((((TS=("Abdominal surgery")) OR TS=("Digestive System Surgical Procedure")) OR TS=("Digestive surgery")) OR TS=("General surgery")) OR TS=("Gynaecologic surgery")) OR TS=("Laparoscopy")) OR TS=("Laparotomy")) OR TS=("bariatric surgery")) OR TS=("visceral surgery")) OR TS=("gastrointestinal surgery")) OR TS=("Oesophagectomy")) OR TS=("esophagectomy")) OR TS=("Liver Transplantation")) OR TS=("Liver resection")) OR TS=("Hepatectomy")) OR TS=("Liver surgery")) OR TS=("Gastrectomy")) OR TS=("Gastroenterostomy")) OR TS=("Biliary Tract Surgical Procedures")) OR TS=("Splenectomy")) OR TS=("Pancreaticoduodenectomy")) OR TS=("Pancreas Transplantation")) OR TS=("Pancreatectomy")) OR TS=("Pancreaticojejunostomy")) OR TS=("Pancreatic surgery")) OR TS=("Pancreatic resection")) OR TS=("Appendectomy")) OR TS=("Colorectal surgery")) OR TS=("Cholecystectomy")) OR TS=("Colectomy")) OR TS=("Colorectal resection")) OR TS=("Proctectomy")) OR TS=("Cystectomy")) OR TS=("Nephrectomy")) OR TS=("Kidney Transplantation")) OR TS=("Hysterectomy")) OR TS=("Ovariectomy")) OR TS=("Salpingectomy")) OR TS=("Prostatectomy") AND ((((((((((((((((((((TS=(Management)) OR TS=("Prevalence")) OR TS=("Prevalences")) OR TS=("Point Prevalence")) OR TS=("Point Prevalences")) OR TS=("Period Prevalence")) OR TS=("Period Prevalences")) OR TS=("Causality")) OR TS=("Causalities")) OR TS=("Enabling Factors")) OR TS=("Enabling Factor")) OR TS=("Multifactorial Causality")) OR TS=("Multifactorial Causalities")) OR TS=("Multiple Causation")) OR TS=("Multiple Causations")) OR TS=("Predisposing Factors")) OR TS=("Predisposing Factor")) OR TS=("Reinforcing Factors")) OR TS=("Reinforcing Factor")) OR TS=("Causation")) OR TS=("Causations") | **1073** |
